# Supplementary material
Source: Springer Nature journal article supplement (https://www.springermedizin.de/resource/supplementary/12890_2014_628_MOESM4_ESM.pdf/9505462)

a)

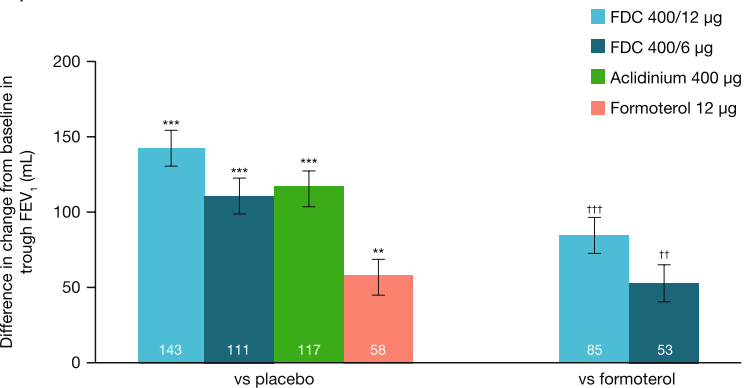

b)

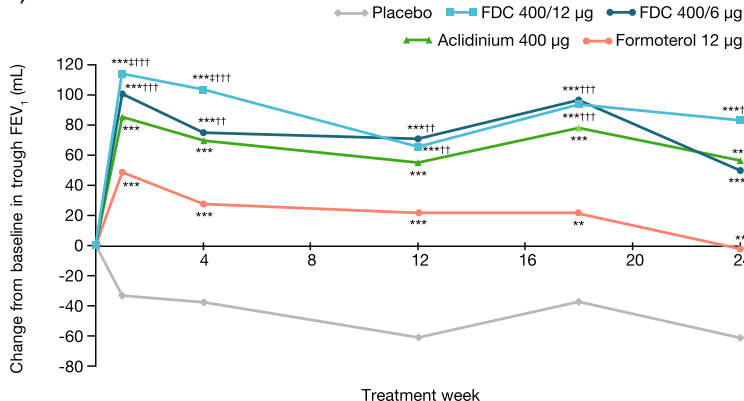

Supplement: MOESM4 [file 9505462]
